# Supplementary material
Source: publisher figshare collection journal article supplement (https://acs.figshare.com/ndownloader/files/5705337)
Supplement: Supplementary file 1 [file 5705337]

# Inorganic Chemistry

including bioinorganic chemistry

Inorg. Chem., 1997, 36(1), 33-43, DOI:[10.1021/ic960738a](https://doi.org/10.1021/ic960738a)

## Terms & Conditions

Electronic Supporting Information files are available without a subscription to ACS Web Editions. The American Chemical Society holds a copyright ownership interest in any copyrightable Supporting Information. Files available from the ACS website may be downloaded for personal use only. Users are not otherwise permitted to reproduce, republish, redistribute, or sell any Supporting Information from the ACS website, either in whole or in part, in either machine-readable form or any other form without permission from the American Chemical Society. For permission to reproduce, republish and redistribute this material, requesters must process their own requests via the RightsLink permission system. Information about how to use the RightsLink permission system can be found at <http://pubs.acs.org/page/copyright/permissions.html>

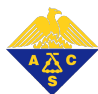

ACS Publications

MOST TRUSTED. MOST CITED. MOST READ.

Copyright © 1997 American Chemical Society

## Supplementary Material

### Structural Studies of $\Lambda$ - and $\Delta$ -[Ru(phen)<sub>2</sub>dppz]<sup>2+</sup> Bound to d(GTCGAC)<sub>2</sub>:

#### Characterization of Enantioselective Intercalation

Cynthia M. Dupureur and Jacqueline K. Barton\*

Beckman Institute, California Institute of Technology

Pasadena, CA 91125

**Figure 1S:** Contour plot of the base-H1' region of the NOESY spectrum of d(GTCGAC)<sub>2</sub> in the absence (A) and presence (B) of 0.75 equivalents  $\Delta$ -[Ru(phen)<sub>2</sub>dppz]<sup>2+</sup> per duplex. Conditions are as described in the text. The H1' NOE walk is indicated for the free duplex. Due to the asymmetric binding of the metal complex under slow exchange conditions, the H1' NOE walk for the bound duplex is less apparent.

**Figure 2S:** Imino proton region of a partial titration of rac- $\Delta$ -[Ru(phen)<sub>2</sub>dppz]<sup>2+</sup> into d(GTCGAC)<sub>2</sub> in 90% H<sub>2</sub>O/10%D<sub>2</sub>O. A jump and return pulse sequence was used to acquire the spectra. The broadening and upfield shifts of the resonances with the addition of metal complex is consistent with intercalation.

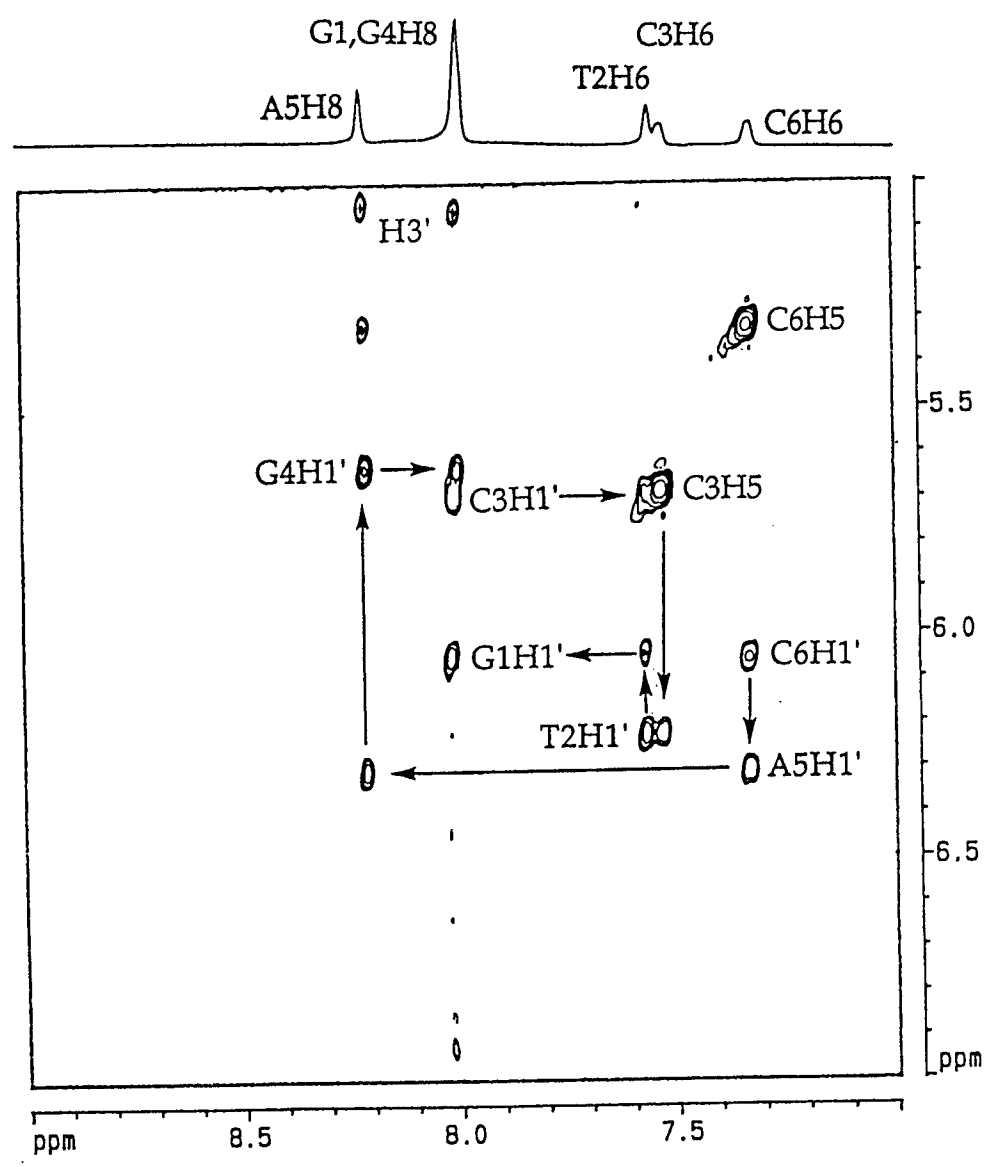

Figure 15A

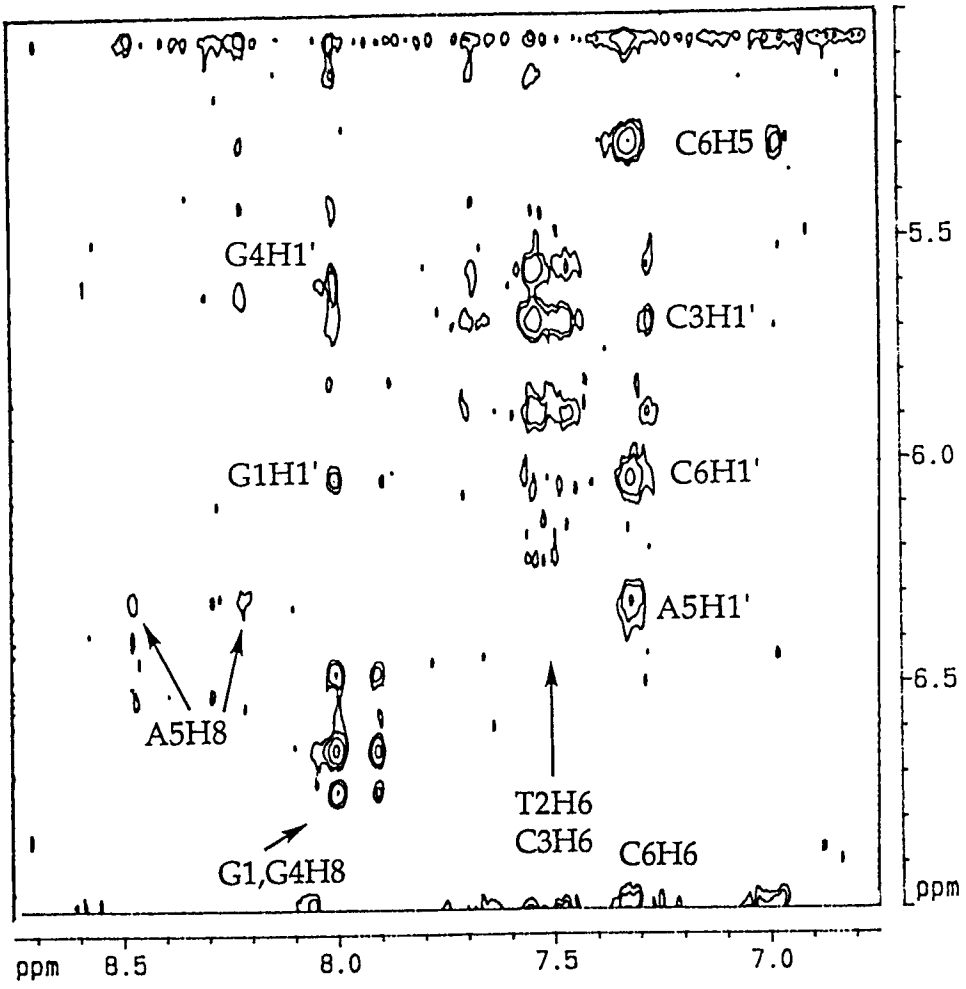

Figure 1SB

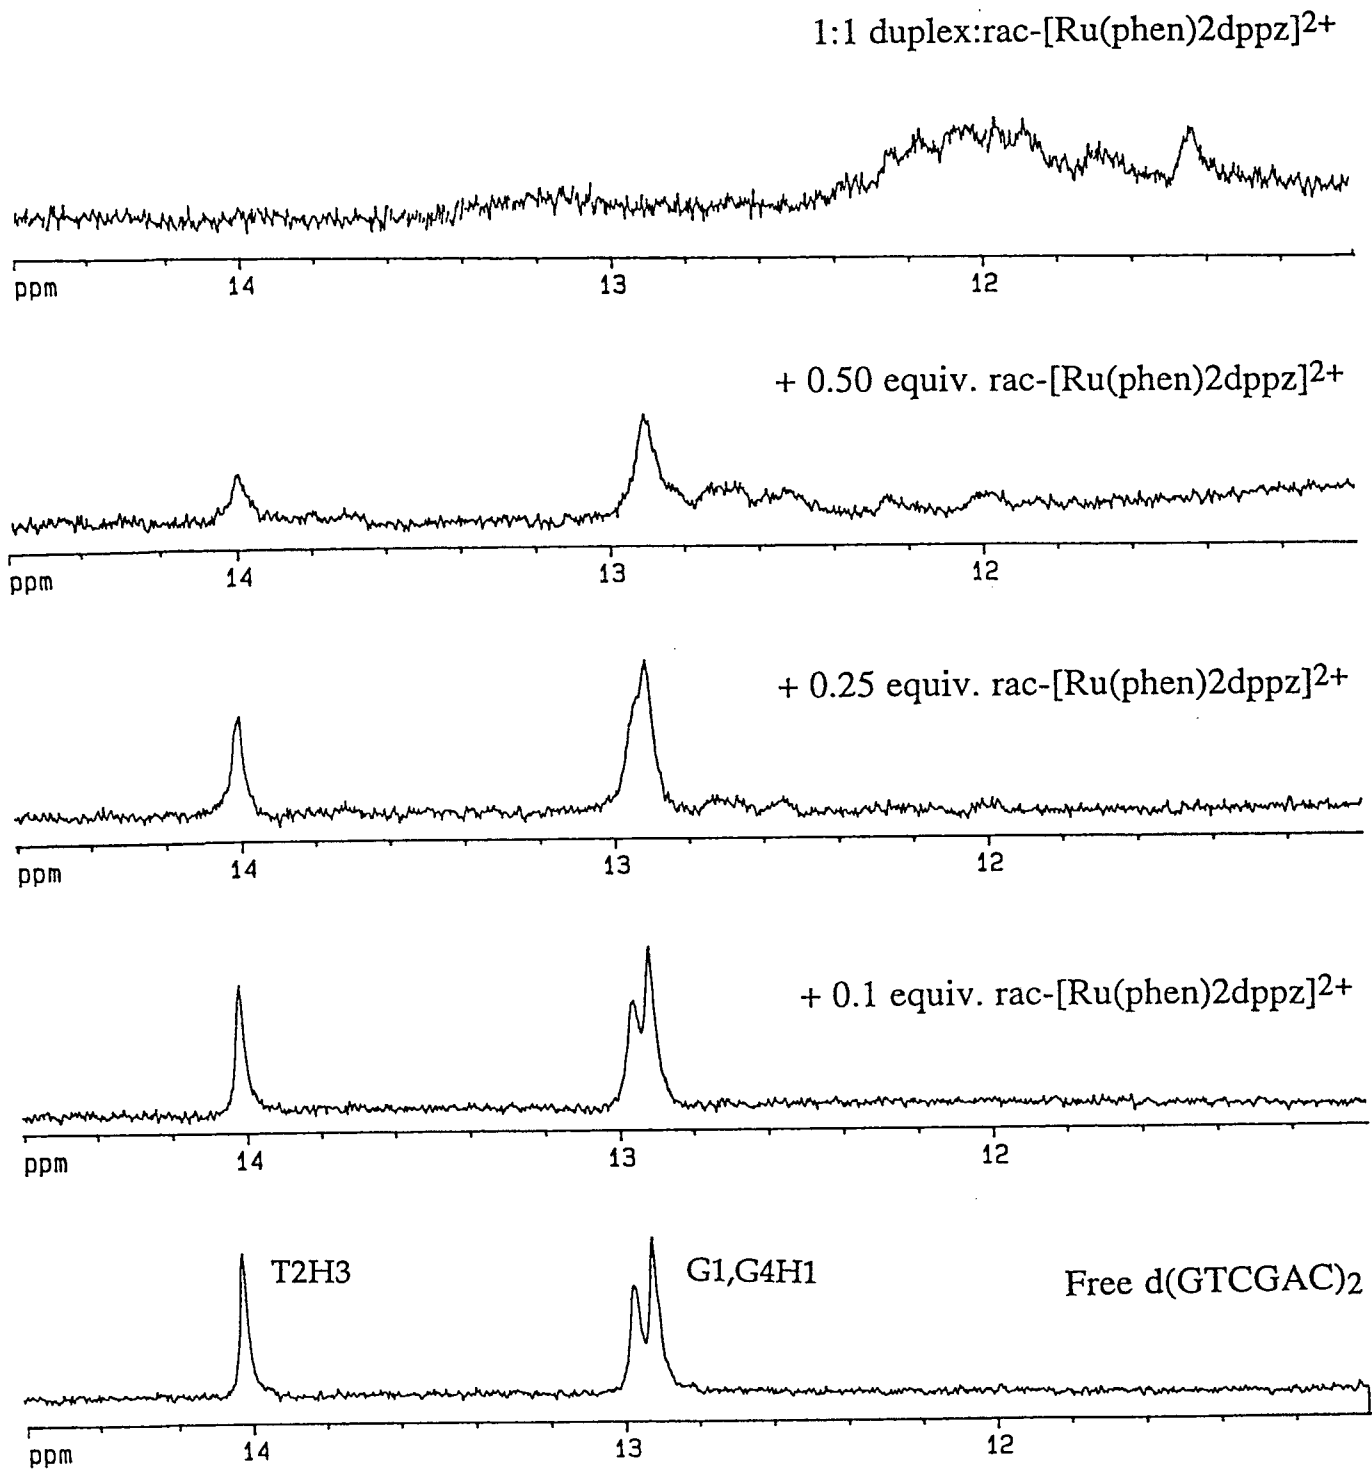

Figure 25
